# Supplementary material
Source: HighWire-hosted journal article supplement (https://www.annfammed.org/highwire/filestream/8921/field_highwire_adjunct_files/0/Frankhouser_Supp_App.pdf)
Supplement: Frankhouser_Supp_App.pdf [file Frankhouser_Supp_App.pdf]

**Supplemental materials for:**

Frankhouser TL, Defenbaugh N. An autoethnographic examination of postpartum depression. *Ann Fam Med*. 2017;15(6):540-545.

## Appendix A

1. What does it feel like to revisit (remember) this story?
2. What did you learn (insights) about yourself from this experience?
3. What did you learn about the cultural influence (people, norms/rules, beliefs, values) of those around you?
